# Supplementary material
Source: MDPI journal article supplement (https://www.mdpi.com/2077-0472/13/2/320)
Supplement: s1 [file s1]

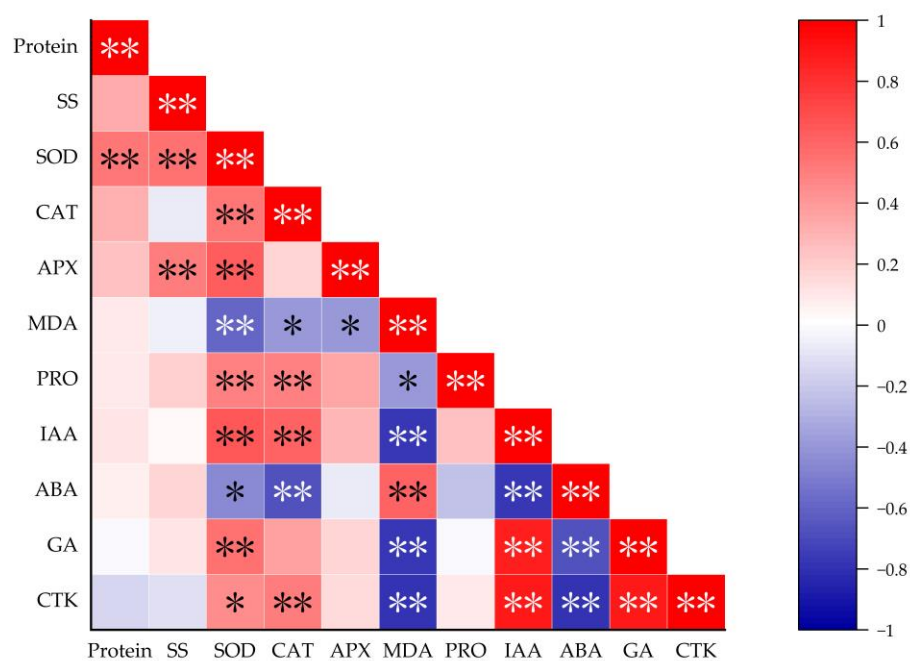

**Figure S1.** Correlation plot of biochemical indicators. Red areas indicate positive correlation, blue areas indicate negative correlation, darker colors indicate that the absolute value of the correlation coefficient between the two indicators is closer to 1. Asterisks indicate significance, \* Significant at  $p \leq 0.01$ , \*\* Significant at  $p \leq 0.001$ .
